# Supplementary material for: Nonvolatile electrical control of valley splitting by ferroelectric polarization switching in a two-dimensional AgBiP2S6/CrBr3 multiferroic heterostructure
Source: Royal Society of Chemistry journal article supplement (doi:10.1039/d2nr04956b), 2022-12-14
Supplement: d2nr04956b1.pdf [file d2nr04956b1.pdf]

## Supplementary Information

### **Nonvolatile electrical control of valley splitting by ferroelectric polarization switching in two-dimensional $\text{AgBiP}_2\text{S}_6/\text{CrBr}_3$ multiferroic heterostructure**

Dongxue Zhang, Yifan Zhang, Baozeng Zhou\*

*Tianjin Key Laboratory of Film Electronic & Communicate Devices, School of Integrated Circuit Science and Engineering, Tianjin University of Technology, Tianjin 300384, China*

\*Corresponding Authors

[baozeng@tju.edu.cn](mailto:baozeng@tju.edu.cn) (B. Zhou)

**Table S1.** Interlayer Distances  $d_i$  (Å) between AgBiP<sub>2</sub>S<sub>6</sub> and CrBr<sub>3</sub>, Binding Energy  $E_b$  (meV/atom), Band-Gap  $E_g$  (eV), Total Magnetic Moments  $M_{tot}$  ( $\mu_B$ ), and Energy Difference  $\Delta E_{FM-AFM}$  (meV) for different configurations of the AgBiP<sub>2</sub>S<sub>6</sub>/CrBr<sub>3</sub> vdW heterostructures.

| <b>Model</b> |           | $d_i$ (Å) | $E_b$<br>(meV/atom) | $E_g$ (eV) | $M_{tot}$ ( $\mu_B$ ) | $\Delta E_{FM-AFM}$<br>(meV) |
|--------------|-----------|-----------|---------------------|------------|-----------------------|------------------------------|
| <b>I</b>     | <b>P+</b> | 3.15      | -188.32             | 1.19       | 5.84                  | -42.86                       |
|              | <b>P-</b> | 3.73      | -182.14             | 1.42       | 5.84                  | -41.09                       |
| <b>II</b>    | <b>P+</b> | 3.34      | -185.62             | 1.15       | 5.84                  | -41.29                       |
|              | <b>P-</b> | 3.76      | -179.47             | 1.41       | 5.84                  | -40.90                       |
| <b>III</b>   | <b>P+</b> | 3.26      | -187.60             | 1.17       | 5.84                  | -42.39                       |
|              | <b>P-</b> | 3.80      | -179.46             | 1.39       | 5.84                  | -40.70                       |

**Table S2.** The lattice vectors and fractional coordinates of each atom in AgBiP<sub>2</sub>S<sub>6</sub>/CrBr<sub>3</sub> heterostructure with P+ state.

|             |                     |                    |                     |
|-------------|---------------------|--------------------|---------------------|
| <b>a[Å]</b> | 6.3516737391921954  | 0.0000000338711972 | 0.0000000000000000  |
| <b>b[Å]</b> | -3.1758368989294152 | 5.5007107977067626 | 0.0000000000000000  |
| <b>c[Å]</b> | 0.0000000000000000  | 0.0000000000000000 | 29.9647006988999998 |
| <b>S</b>    | 0.9909565350833234  | 0.6153824755154375 | 0.4476054072655399  |
| <b>S</b>    | 0.3846175114845642  | 0.3755740305678862 | 0.4476054072655399  |
| <b>S</b>    | 0.6244259944321126  | 0.0090435039166768 | 0.4476054072655399  |
| <b>S</b>    | 0.3376691530403998  | 0.0519300521851825 | 0.3323641611108283  |
| <b>S</b>    | 0.9480699058148216  | 0.2857391048552255 | 0.3323641611108283  |
| <b>S</b>    | 0.7142609531447792  | 0.6623308659595973 | 0.3323641611108283  |
| <b>Br</b>   | 0.0172715030579112  | 0.3322965585541545 | 0.5528608831528239  |
| <b>Br</b>   | 0.6677034714458490  | 0.6849749345037568 | 0.5528608831528239  |
| <b>Br</b>   | 0.3150250724962477  | 0.9827284889420868 | 0.5528608831528239  |
| <b>Br</b>   | 0.6662523392471248  | 0.9823661886040973 | 0.6488545151122515  |
| <b>Br</b>   | 0.0176338493958982  | 0.6838861076430283 | 0.6488545151122515  |
| <b>Br</b>   | 0.3161138873569764  | 0.3337477077528752 | 0.6488545151122515  |
| <b>P</b>    | 0.6666667060000009  | 0.3333333380000028 | 0.3501788018525476  |
| <b>P</b>    | 0.6666667060000009  | 0.3333333380000028 | 0.4257640105547345  |
| <b>Ag</b>   | -0.0000000000000000 | 0.0000000000000000 | 0.4255378381306612  |
| <b>Bi</b>   | 0.3333333380000028  | 0.6666666750000019 | 0.3798650698726054  |
| <b>Cr</b>   | -0.0000000000000000 | 0.0000000000000000 | 0.6009813130007060  |
| <b>Cr</b>   | 0.3333333380000028  | 0.6666666750000019 | 0.6007581156644234  |

**Table S3.** The lattice vectors and fractional coordinates of each atom in AgBiP<sub>2</sub>S<sub>6</sub>/CrBr<sub>3</sub> heterostructure with P– state.

|             |                     |                    |                     |
|-------------|---------------------|--------------------|---------------------|
| <b>a[Å]</b> | 6.3479298765991805  | 0.0000001374165001 | 0.0000000000000000  |
| <b>b[Å]</b> | -3.1739650573057689 | 5.4974684658205364 | 0.0000000000000000  |
| <b>c[Å]</b> | 0.0000000000000000  | 0.0000000000000000 | 29.9647006988999998 |
| <b>S</b>    | 0.9904235723877730  | 0.6172551697405315 | 0.3247562426483977  |
| <b>S</b>    | 0.6268316253527615  | 0.0095764396122271 | 0.3247562426483977  |
| <b>S</b>    | 0.3827448272594640  | 0.3731684036472387 | 0.3247562426483977  |
| <b>S</b>    | 0.3386597105855122  | 0.0513976193629148 | 0.4403088212043350  |
| <b>S</b>    | 0.7127379277773972  | 0.6613402904144827 | 0.4403088212043350  |
| <b>S</b>    | 0.9486023436370893  | 0.2872621002226043 | 0.4403088212043350  |
| <b>Br</b>   | 0.6666200061735178  | 0.6849993356892514 | 0.5648679352483319  |
| <b>Br</b>   | 0.0183794035157319  | 0.3333799998264828 | 0.5648679352483319  |
| <b>Br</b>   | 0.3150006453107513  | 0.9816205814842700 | 0.5648679352483319  |
| <b>Br</b>   | 0.3158648572492148  | 0.3332540523854736 | 0.6609852731176955  |
| <b>Br</b>   | 0.0173891871362584  | 0.6841351397507880 | 0.6609852731176955  |
| <b>Br</b>   | 0.6667459386145294  | 0.9826108368637442 | 0.6609852731176955  |
| <b>P</b>    | 0.6666666750000019  | 0.3333333380000028 | 0.4220389154458148  |
| <b>P</b>    | 0.6666666750000019  | 0.3333333380000028 | 0.3463370249089215  |
| <b>Ag</b>   | 0.0000000000000000  | 0.0000000000000000 | 0.3519161150966360  |
| <b>Bi</b>   | 0.3333333380000028  | 0.6666667060000009 | 0.3922070613437507  |
| <b>Cr</b>   | 0.3333333380000028  | 0.6666667060000009 | 0.6130059525070672  |
| <b>Cr</b>   | 0.0000000000000000  | 0.0000000000000000 | 0.6129801780415449  |

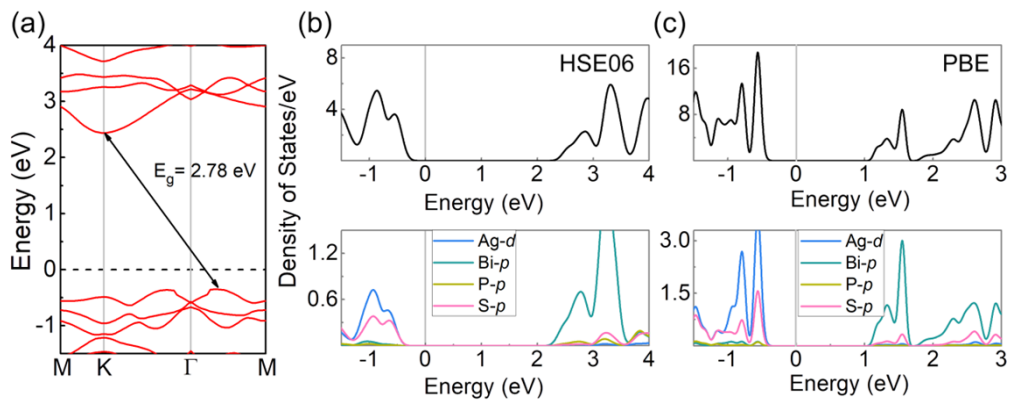

**Fig. S1** (a) Band structure of the monolayer AgBiP<sub>2</sub>S<sub>6</sub> calculated by HSE06 method.

The total DOS and orbital-resolved PDOS for each atom calculated by (b)

HSE06 and (c) PBE method, respectively.

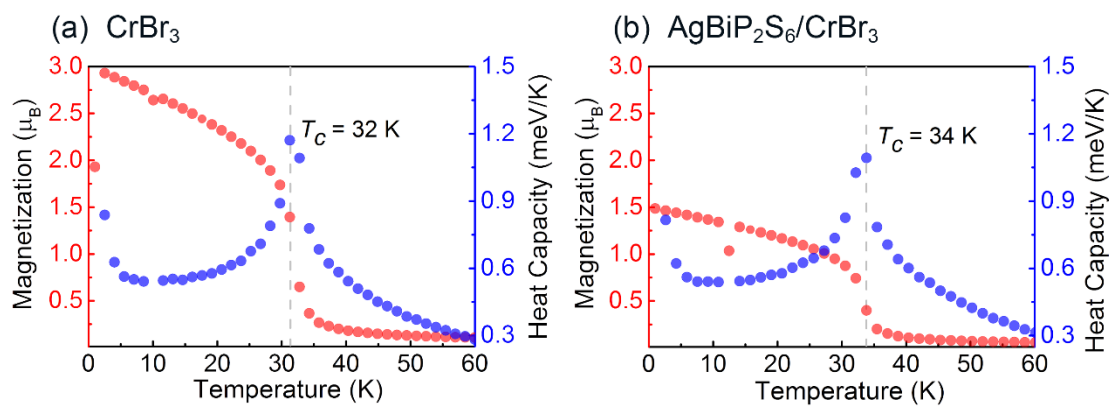

**Fig. S2** The magnetization and heat capacity as functions of temperature for (a)  $\text{CrBr}_3$  monolayer and (b)  $\text{AgBiP}_2\text{S}_6/\text{CrBr}_3$  heterostructure.

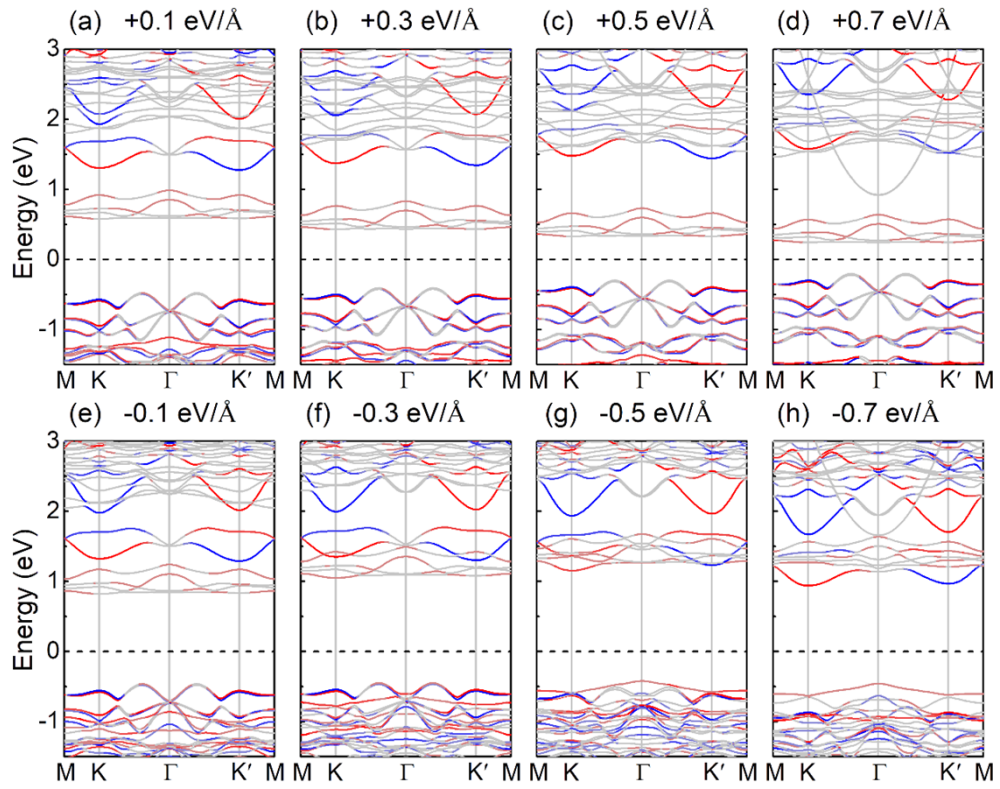

**Fig. S3** Calculated band structures of the  $\text{AgBiP}_2\text{S}_6/\text{CrBr}_3$  heterostructure in the polarized state P+ under different electric field from  $-0.7 \text{ V/\AA}$  to  $+0.7 \text{ V/\AA}$ .

The Fermi level is set to zero.

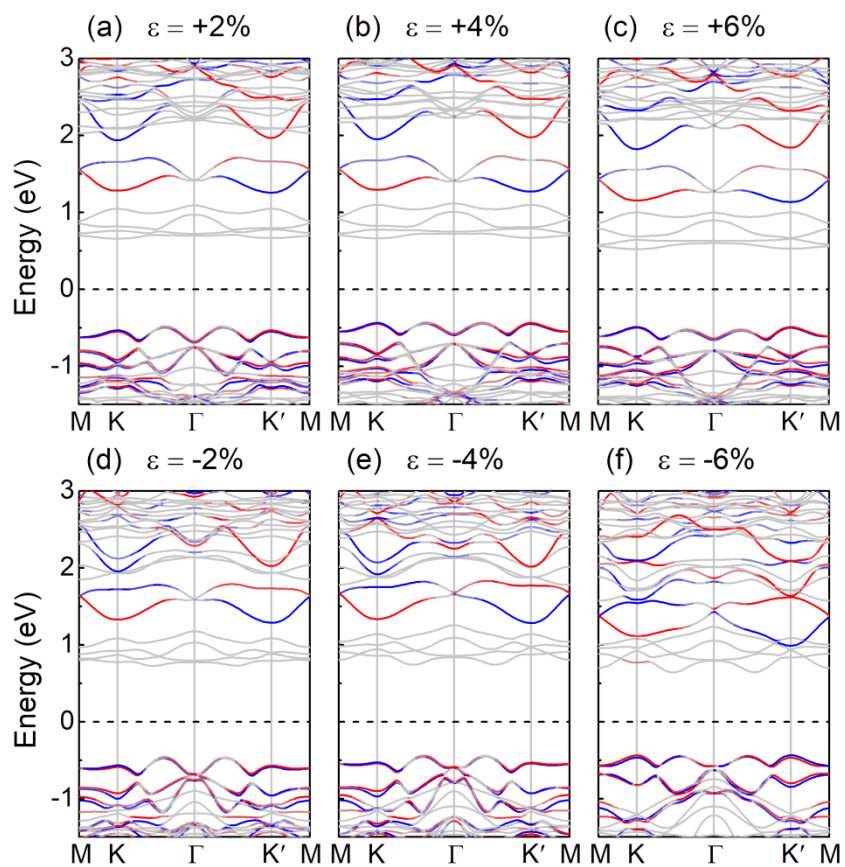

**Fig. S4** Band structures of AgBiP<sub>2</sub>S<sub>6</sub>/CrBr<sub>3</sub> heterostructure in the polarized state P+ under different strain from  $-6\%$  to  $+6\%$ . The Fermi level is set to zero.



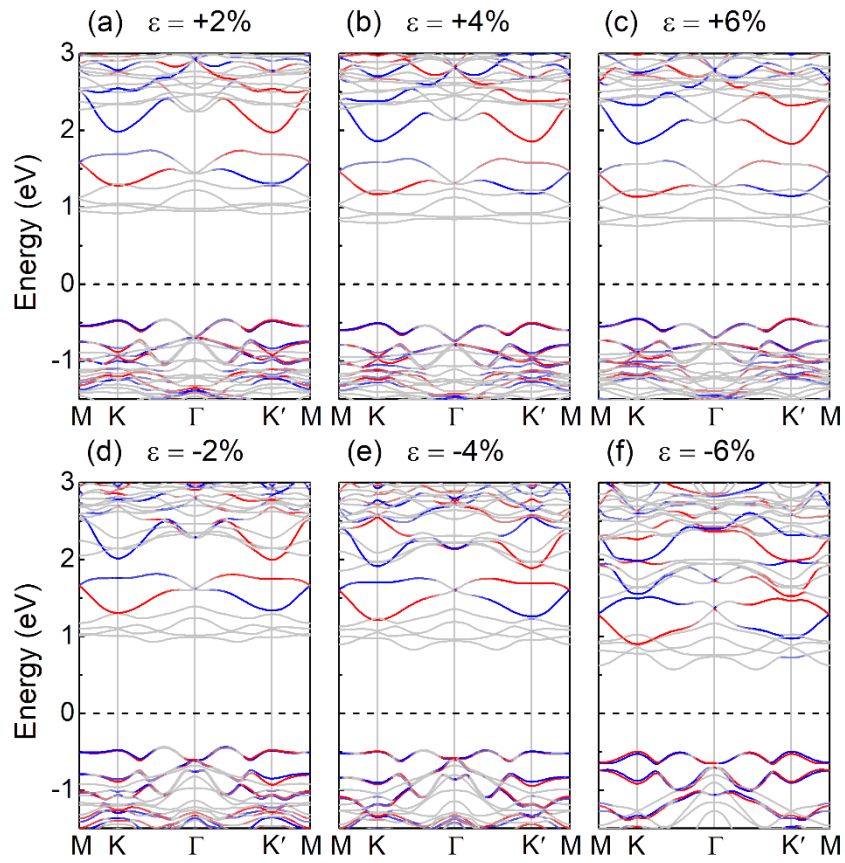

**Fig. S5** Band structures of  $\text{AgBiP}_2\text{S}_6/\text{CrBr}_3$  heterostructure in the polarized state P- under different strain from  $-6\%$  to  $+6\%$ . The Fermi level is set to zero.
